# Supplementary material
Source: PubMed Central journal article supplement (PMC11105569)
Supplement: 18_2017_2699_MOESM1_ESM.pdf [file 18_2017_2699_MOESM1_ESM.pdf]

## SUPPORTING INFORMATION

## Characterizations of PMCA2-interacting complex and its role as a calcium oxalate crystal-binding protein

Arada Vinaiphath and Visith Thongboonkerd\*

\*Correspondence to: [thongboonkerd@dr.com](mailto:thongboonkerd@dr.com) (or) [ythongbo@yahoo.com](mailto:ythongbo@yahoo.com)

Supplementary Table S1. Mass spectrometric parameters of PMCA2-interacting proteins identified by IP-MS.

| Protein no. | Protein name                                               | UniProt accession number | MudPIT identification score | %Cov  | No. of distinct/total matched peptides | pI    | MW (kDa) |
|-------------|------------------------------------------------------------|--------------------------|-----------------------------|-------|----------------------------------------|-------|----------|
| 1           | 14-3-3 protein theta                                       | Q3SZI4                   | 73                          | 18.40 | 6/15                                   | 4.68  | 28.03    |
| 2           | 26S protease regulatory subunit 6B                         | Q3T030                   | 210                         | 7.20  | 3/6                                    | 5.09  | 47.45    |
| 3           | 26S protease regulatory subunit 7                          | Q4R4R0                   | 63                          | 25.40 | 11/12                                  | 5.71  | 49.00    |
| 4           | 26S proteasome non-ATPase regulatory subunit 13            | Q9UNM6                   | 54                          | 15.70 | 6/7                                    | 5.53  | 43.20    |
| 5           | 26S proteasome non-ATPase regulatory subunit 14            | O00487                   | 130                         | 11.60 | 3/4                                    | 6.06  | 34.73    |
| 6           | 26S proteasome non-ATPase regulatory subunit 3             | O43242                   | 69                          | 16.90 | 8/10                                   | 8.47  | 61.05    |
| 7           | 26S proteasome non-ATPase regulatory subunit 7             | Q3ZBD0                   | 71                          | 9.60  | 3/4                                    | 6.29  | 36.79    |
| 8           | 2-oxoglutarate dehydrogenase, mitochondrial                | Q148N0                   | 44                          | 7.40  | 7/11                                   | 6.28  | 116.88   |
| 9           | 2-oxoglutarate dehydrogenase-like, mitochondrial           | Q9ULD0                   | 44                          | 5.30  | 5/9                                    | 6.18  | 115.26   |
| 10          | 2-oxoisovalerate dehydrogenase subunit beta, mitochondrial | P35738                   | 117                         | 10.50 | 4/9                                    | 6.41  | 43.54    |
| 11          | 40S ribosomal protein SA                                   | Q2L9X0                   | 153                         | 18.60 | 6/14                                   | 4.80  | 32.96    |
| 12          | 5'-AMP-activated protein kinase catalytic subunit alpha-1  | Q5EG47                   | 48                          | 9.50  | 6/7                                    | 8.33  | 64.52    |
| 13          | 60 kDa heat shock protein, mitochondrial                   | P10809                   | 260                         | 26.90 | 14/30                                  | 5.70  | 61.19    |
| 14          | 60S acidic ribosomal protein P0                            | P05388                   | 473                         | 22.40 | 6/16                                   | 5.71  | 34.42    |
| 15          | 60S ribosomal protein L10                                  | Q4R7Y2                   | 38                          | 13.10 | 3/7                                    | 10.22 | 25.04    |
| 16          | 60S ribosomal protein L3                                   | P39872                   | 40                          | 6.50  | 2/3                                    | 10.24 | 46.28    |
| 17          | 60S ribosomal protein L5                                   | Q58DW5                   | 98                          | 24.90 | 8/17                                   | 9.73  | 34.55    |
| 18          | 60S ribosomal protein L6                                   | P21533                   | 68                          | 18.80 | 5/6                                    | 10.74 | 33.60    |
| 19          | Abl interactor 1                                           | Q8IZP0                   | 78                          | 5.30  | 2/3                                    | 6.57  | 55.16    |
| 20          | Actin-binding LIM protein 3                                | O94929                   | 431                         | 16.40 | 11/21                                  | 8.86  | 79.46    |
| 21          | Activating signal cointegrator 1                           | Q15650                   | 40                          | 6.50  | 4/9                                    | 8.05  | 66.96    |
| 22          | Acyl-CoA dehydrogenase family member 11                    | Q709F0                   | 138                         | 11.00 | 6/11                                   | 8.35  | 88.03    |
| 23          | Adenylyltransferase and sulfurtransferase MOCS3            | A2BDX3                   | 116                         | 7.40  | 4/12                                   | 7.46  | 50.31    |
| 24          | ADP/ATP translocase 1                                      | P12235                   | 445                         | 29.90 | 10/27                                  | 9.78  | 33.27    |
| 25          | ADP/ATP translocase 4                                      | Q4R8M0                   | 50                          | 21.30 | 7/16                                   | 9.91  | 35.34    |
| 26          | A-kinase anchor protein 8                                  | Q5VK71                   | 117                         | 5.60  | 4/4                                    | 5.07  | 77.36    |
| 27          | Alpha-aminoadipic semialdehyde dehydrogenase               | P49419                   | 44                          | 13.40 | 6/17                                   | 8.21  | 59.02    |
| 28          | Alpha-S2-casein-like A                                     | Q02862                   | 39                          | 3.80  | 2/10                                   | 6.21  | 21.26    |
| 29          | Aly/REF export factor 2                                    | Q9JJW6                   | 73                          | 24.30 | 5/7                                    | 10.04 | 23.77    |

|    |                                                                                    |        |     |       |        |      |        |
|----|------------------------------------------------------------------------------------|--------|-----|-------|--------|------|--------|
| 30 | Angiotensin-converting enzyme 2                                                    | Q58DD0 | 44  | 7.20  | 5/9    | 5.19 | 93.46  |
| 31 | Ankyrin repeat and EF-hand domain-containing protein 1                             | Q9D2J7 | 39  | 12.90 | 11/29  | 8.51 | 87.59  |
| 32 | Ankyrin repeat and SOCS box protein 7                                              | Q5RCK5 | 47  | 9.10  | 4/5    | 8.58 | 36.36  |
| 33 | Annexin A1                                                                         | P10107 | 152 | 6.90  | 3/14   | 6.97 | 39.00  |
| 34 | AP-1 complex subunit beta-1                                                        | Q10567 | 75  | 10.00 | 10/11  | 4.94 | 105.48 |
| 35 | AP-1 complex subunit mu-1                                                          | Q2KJ81 | 63  | 10.60 | 5/7    | 6.82 | 48.73  |
| 36 | AP-1 complex subunit mu-2                                                          | Q9WVP1 | 72  | 14.70 | 6/6    | 7.07 | 48.22  |
| 37 | AP-2 complex subunit beta                                                          | Q9DBG3 | 112 | 15.70 | 16/23  | 5.22 | 105.43 |
| 38 | AP-2 complex subunit mu                                                            | Q5NVF7 | 49  | 10.60 | 4/8    | 9.53 | 49.98  |
| 39 | APOBEC1 complementation factor                                                     | Q9NQ94 | 44  | 19.90 | 10/40  | 8.60 | 65.45  |
| 40 | Aspartate aminotransferase, mitochondrial                                          | P00507 | 40  | 14.20 | 6/12   | 9.13 | 47.68  |
| 41 | Aspartate--tRNA ligase, cytoplasmic                                                | Q5R9I5 | 109 | 29.90 | 15/22  | 6.02 | 57.65  |
| 42 | ATPase family AAA domain-containing protein 3A                                     | Q9NVI7 | 285 | 19.70 | 10/23  | 9.08 | 71.61  |
| 43 | ATPase family AAA domain-containing protein 3B                                     | Q5T9A4 | 298 | 17.40 | 11/88  | 9.30 | 73.10  |
| 44 | ATP-binding cassette sub-family E member 1                                         | P61221 | 123 | 12.20 | 7/16   | 8.63 | 68.24  |
| 45 | ATP-binding cassette sub-family F member 3                                         | Q66H39 | 60  | 9.20  | 6/14   | 6.06 | 80.21  |
| 46 | ATP-citrate synthase                                                               | P53396 | 80  | 9.90  | 11/47  | 6.95 | 121.67 |
| 47 | ATP-dependent 6-phosphofructokinase, platelet type                                 | Q5R636 | 329 | 23.00 | 15/27  | 7.49 | 86.44  |
| 48 | ATP-dependent RNA helicase DDX1                                                    | Q0IIK5 | 390 | 22.70 | 14/23  | 6.81 | 83.33  |
| 49 | ATP-dependent RNA helicase DDX39A                                                  | O00148 | 49  | 15.90 | 9/14   | 5.46 | 49.61  |
| 50 | ATP-dependent RNA helicase DHX8                                                    | Q14562 | 41  | 9.80  | 13/25  | 8.54 | 140.08 |
| 51 | ATP-dependent zinc metalloprotease YME1L1                                          | Q96TA2 | 45  | 15.90 | 10/16  | 8.86 | 86.69  |
| 52 | Band 4.1-like protein 5                                                            | Q9HCM4 | 85  | 13.80 | 8/14   | 6.15 | 82.38  |
| 53 | Basic leucine zipper and W2 domain-containing protein 2                            | Q9WTT7 | 47  | 12.90 | 4/5    | 6.26 | 48.25  |
| 54 | Beta-enolase                                                                       | Q1KYT0 | 154 | 14.10 | 5/12   | 8.05 | 47.44  |
| 55 | Bifunctional glutamate/proline--tRNA ligase                                        | P07814 | 87  | 10.00 | 13/32  | 7.02 | 172.08 |
| 56 | Bifunctional methylenetetrahydrofolate dehydrogenase/cyclohydrolase, mitochondrial | P13995 | 65  | 16.30 | 4/12   | 8.86 | 38.04  |
| 57 | Breast cancer type 2 susceptibility protein homolog                                | O35923 | 46  | 7.80  | 27/101 | 6.13 | 376.26 |
| 58 | BTB/POZ domain-containing protein 9                                                | A4IFG2 | 38  | 2.80  | 2/2    | 5.47 | 69.83  |
| 59 | Bystin                                                                             | Q80WL2 | 41  | 16.30 | 7/23   | 8.15 | 50.27  |
| 60 | CAD protein                                                                        | P08955 | 58  | 5.30  | 12/28  | 6.02 | 245.54 |
| 61 | Calcium uniporter protein, mitochondrial                                           | Q8NE86 | 121 | 24.80 | 8/16   | 8.83 | 40.13  |
| 62 | Calumenin                                                                          | Q5RDD8 | 53  | 14.30 | 5/12   | 4.45 | 37.26  |
| 63 | Cathepsin Z                                                                        | Q9UBR2 | 218 | 11.60 | 4/23   | 6.70 | 34.53  |
| 64 | Cell cycle and apoptosis regulator protein 2                                       | Q8N163 | 42  | 7.60  | 7/26   | 5.14 | 103.47 |
| 65 | Cell division control protein 45 homolog                                           | Q9Z1X9 | 47  | 10.20 | 6/10   | 5.24 | 65.97  |
| 66 | Cell division cycle 5-like protein                                                 | Q99459 | 140 | 14.20 | 12/16  | 8.22 | 92.42  |
| 67 | Cell division cycle protein 123 homolog                                            | Q62834 | 39  | 6.80  | 2/10   | 4.52 | 39.36  |
| 68 | Centromere protein V                                                               | Q9CXS4 | 37  | 13.50 | 3/3    | 9.85 | 27.98  |
| 69 | Centrosomal protein of 104 kDa                                                     | Q80V31 | 53  | 10.60 | 9/18   | 8.40 | 104.96 |
| 70 | Centrosomal protein of 164 kDa                                                     | Q9UPV0 | 38  | 10.50 | 12/32  | 5.27 | 164.73 |

Supplementary Table S1 (p. 3 of 12)

|     |                                                                                                                  |        |     |       |       |       |        |
|-----|------------------------------------------------------------------------------------------------------------------|--------|-----|-------|-------|-------|--------|
| 71  | Chloride intracellular channel protein 1                                                                         | Q5E9B7 | 75  | 21.20 | 5/8   | 5.16  | 27.32  |
| 72  | Chromatin assembly factor 1 subunit B                                                                            | Q9D0N7 | 80  | 5.80  | 4/12  | 6.12  | 63.61  |
| 73  | Clathrin coat assembly protein AP180                                                                             | Q05140 | 37  | 10.60 | 9/16  | 4.76  | 93.75  |
| 74  | Cleavage and polyadenylation specificity factor subunit 3                                                        | Q9QXK7 | 68  | 9.90  | 6/8   | 5.37  | 78.08  |
| 75  | Cleft lip and palate transmembrane protein 1 homolog                                                             | Q8VBZ3 | 48  | 5.90  | 4/7   | 5.88  | 75.59  |
| 76  | Coatomer subunit delta                                                                                           | P53619 | 69  | 22.90 | 11/17 | 5.89  | 57.69  |
| 77  | Coiled-coil domain-containing protein 28A                                                                        | Q8IWP9 | 34  | 7.30  | 2/4   | 9.32  | 30.52  |
| 78  | Coiled-coil domain-containing protein 61                                                                         | Q9Y6R9 | 39  | 21.90 | 11/21 | 10.27 | 57.56  |
| 79  | Coiled-coil-helix-coiled-coil-helix domain-containing protein 3, mitochondrial                                   | Q5E9D3 | 149 | 27.30 | 6/9   | 8.52  | 26.31  |
| 80  | Collagen alpha-2(IV) chain                                                                                       | P08122 | 67  | 9.30  | 13/36 | 8.75  | 168.42 |
| 81  | Constitutive coactivator of PPAR-gamma-like protein 1                                                            | A6H7H1 | 39  | 6.80  | 7/11  | 9.10  | 122.67 |
| 82  | Constitutive coactivator of PPAR-gamma-like protein 2                                                            | Q9NX05 | 56  | 7.20  | 7/19  | 9.19  | 121.65 |
| 83  | Core histone macro-H2A.1                                                                                         | O75367 | 112 | 31.20 | 8/16  | 9.80  | 39.76  |
| 84  | Core histone macro-H2A.2                                                                                         | Q8CCK0 | 75  | 13.40 | 3/14  | 9.71  | 40.30  |
| 85  | Coronin-6                                                                                                        | Q6QEF8 | 75  | 13.10 | 7/17  | 5.63  | 53.19  |
| 86  | Cullin-1                                                                                                         | Q5R4G6 | 81  | 13.80 | 12/19 | 8.19  | 90.31  |
| 87  | Cyclin-dependent kinase 17                                                                                       | Q00537 | 146 | 10.90 | 7/21  | 9.10  | 59.83  |
| 88  | Cyclin-dependent kinase 20                                                                                       | Q5EDC3 | 146 | 11.50 | 4/19  | 9.69  | 27.58  |
| 89  | Cytokine-dependent hematopoietic cell linker                                                                     | Q7Z7G1 | 54  | 9.10  | 4/8   | 9.11  | 49.81  |
| 90  | Cytoskeleton-associated protein 2                                                                                | A5D7U0 | 47  | 21.00 | 10/22 | 9.33  | 70.56  |
| 91  | Cytosolic carboxypeptidase 4                                                                                     | Q09M05 | 57  | 7.00  | 7/19  | 6.91  | 110.78 |
| 92  | Death-associated protein kinase 1                                                                                | Q80YE7 | 82  | 13.90 | 19/41 | 6.43  | 163.22 |
| 93  | Death-associated protein kinase 3                                                                                | O43293 | 56  | 22.20 | 10/16 | 6.44  | 52.67  |
| 94  | Delta-1-pyrroline-5-carboxylate synthase                                                                         | Q9Z110 | 49  | 15.20 | 12/18 | 7.18  | 87.78  |
| 95  | Deoxyribonuclease-1-like 1                                                                                       | Q2QDE9 | 66  | 6.60  | 2/4   | 5.52  | 35.49  |
| 96  | Dialcylglycerol kinase beta                                                                                      | Q9Y6T7 | 52  | 10.10 | 8/23  | 8.11  | 92.13  |
| 97  | Dihydrolipoyllysine-residue succinyltransferase component of 2-oxoglutarate dehydrogenase complex, mitochondrial | P11179 | 566 | 23.30 | 11/30 | 9.11  | 49.28  |
| 98  | Dihydropyrimidinase                                                                                              | Q14117 | 39  | 8.10  | 4/6   | 6.81  | 57.11  |
| 99  | Dihydropyrimidinase-related protein 1                                                                            | Q14194 | 39  | 12.10 | 5/9   | 6.55  | 62.49  |
| 100 | Dihydropyrimidinase-related protein 2                                                                            | Q5R9Y6 | 39  | 5.10  | 2/3   | 5.95  | 62.71  |
| 101 | DNA mismatch repair protein Mlh1                                                                                 | Q5E954 | 208 | 20.90 | 7/13  | 6.65  | 45.60  |
| 102 | DNA mismatch repair protein Msh2                                                                                 | Q2HJ94 | 81  | 19.20 | 7/11  | 6.06  | 46.36  |
| 103 | DNA polymerase beta                                                                                              | Q9NXW2 | 99  | 14.70 | 5/9   | 8.67  | 42.02  |
| 104 | DNA replication licensing factor MCM5                                                                            | Q9DC23 | 132 | 12.50 | 12/21 | 6.53  | 91.89  |
| 105 | DNA topoisomerase 2-beta                                                                                         | Q5RC70 | 59  | 10.40 | 6/24  | 8.54  | 63.54  |
| 106 | DNA topoisomerase I, mitochondrial                                                                               | P97679 | 87  | 19.00 | 10/30 | 5.63  | 85.17  |
| 107 | DnaJ homolog subfamily A member 1                                                                                | Q3MHE4 | 49  | 11.60 | 11/22 | 5.59  | 105.65 |
| 108 | DnaJ homolog subfamily A member 2                                                                                | P06746 | 46  | 19.40 | 5/10  | 9.01  | 38.33  |
| 109 | DnaJ homolog subfamily B member 12                                                                               | Q0V8B7 | 81  | 19.20 | 14/15 | 8.47  | 82.89  |
| 110 | DnaJ homolog subfamily C member 10                                                                               | Q64399 | 41  | 10.90 | 19/23 | 8.30  | 182.87 |
| 111 | DnaJ homolog subfamily C member 11                                                                               | Q969P6 | 53  | 11.60 | 7/10  | 9.46  | 70.40  |

Supplementary Table S1 (p. 4 of 12)

|     |                                                                               |        |      |       |        |      |        |
|-----|-------------------------------------------------------------------------------|--------|------|-------|--------|------|--------|
| 112 | Dolichyl-diphosphooligosaccharide--protein glycosyltransferase 48 kDa subunit | Q05052 | 215  | 14.60 | 7/16   | 5.91 | 49.72  |
| 113 | Dolichyl-diphosphooligosaccharide--protein glycosyltransferase subunit 1      | Q9GMB0 | 251  | 11.50 | 7/16   | 6.10 | 68.82  |
| 114 | Dolichyl-diphosphooligosaccharide--protein glycosyltransferase subunit 2      | Q3SZI6 | 77   | 2.20  | 1/1    | 5.48 | 69.29  |
| 115 | Double-stranded RNA-binding protein Staufen homolog 1                         | D2GVP7 | 60   | 12.60 | 6/10   | 9.52 | 63.70  |
| 116 | Drebrin-like protein                                                          | Q9UJU6 | 36   | 3.50  | 1/3    | 5.02 | 48.46  |
| 117 | Dual serine/threonine and tyrosine protein kinase                             | Q4TVR5 | 49   | 12.40 | 10/150 | 6.40 | 106.16 |
| 118 | Dual specificity tyrosine-phosphorylation-regulated kinase 1A                 | Q13627 | 94   | 11.50 | 10/19  | 8.90 | 86.04  |
| 119 | Dual specificity tyrosine-phosphorylation-regulated kinase 1B                 | Q9Y463 | 62   | 10.30 | 8/14   | 9.25 | 69.73  |
| 120 | Dynamin-3                                                                     | Q8BZ98 | 66   | 11.60 | 9/19   | 8.52 | 97.53  |
| 121 | Dystonin                                                                      | Q03001 | 41   | 7.90  | 59/194 | 5.14 | 865.26 |
| 122 | Dystrobrevin alpha                                                            | Q9Y4J8 | 45   | 13.50 | 11/19  | 6.43 | 84.65  |
| 123 | Dystrobrevin beta                                                             | O70585 | 55   | 9.60  | 8/15   | 8.90 | 75.21  |
| 124 | E3 SUMO-protein ligase RanBP2                                                 | Q9ERU9 | 45   | 6.50  | 21/44  | 5.82 | 344.73 |
| 125 | E3 ubiquitin-protein ligase TRIM39                                            | Q1XHU0 | 120  | 10.80 | 6/14   | 8.02 | 60.73  |
| 126 | E3 ubiquitin-protein ligase TRIM56                                            | E1BD59 | 43   | 15.00 | 10/15  | 8.33 | 80.81  |
| 127 | E3 ubiquitin-protein ligase UHRF1                                             | Q7TPK1 | 55   | 6.70  | 6/9    | 8.56 | 88.88  |
| 128 | Echinoderm microtubule-associated protein-like 4                              | Q9HC35 | 58   | 11.30 | 9/13   | 5.96 | 109.93 |
| 129 | EH domain-containing protein 1                                                | Q9WVK4 | 85   | 19.50 | 10/13  | 6.35 | 60.62  |
| 130 | EH domain-containing protein 2                                                | Q8BH64 | 49   | 5.30  | 3/7    | 6.08 | 61.31  |
| 131 | EH domain-containing protein 3                                                | Q9NZN3 | 62   | 22.60 | 9/14   | 6.12 | 60.91  |
| 132 | EH domain-containing protein 4                                                | Q9H223 | 472  | 24.20 | 13/20  | 6.33 | 61.37  |
| 133 | ELAV-like protein 4                                                           | O09032 | 54   | 8.60  | 3/6    | 9.45 | 41.22  |
| 134 | Electron transfer flavoprotein subunit alpha, mitochondrial                   | Q5RC31 | 47   | 12.90 | 3/4    | 8.62 | 35.49  |
| 135 | Elongation factor 1-alpha 2                                                   | Q32PH8 | 1153 | 18.60 | 11/65  | 9.11 | 50.78  |
| 136 | Elongation factor 1-delta                                                     | A5D989 | 125  | 18.90 | 5/10   | 4.94 | 31.24  |
| 137 | Elongation factor 1-gamma                                                     | Q9D8N0 | 291  | 21.50 | 11/19  | 6.31 | 50.37  |
| 138 | Endonuclease domain-containing 1 protein                                      | Q8C522 | 119  | 8.40  | 4/25   | 5.80 | 55.91  |
| 139 | Ephrin type-A receptor 2                                                      | Q1KL86 | 77   | 12.10 | 11/56  | 5.89 | 109.98 |
| 140 | Epidermal growth factor receptor kinase substrate 8                           | Q5R4H4 | 75   | 17.00 | 12/52  | 6.91 | 92.26  |
| 141 | Epidermal growth factor receptor kinase substrate 8-like protein 2            | Q99K30 | 651  | 19.10 | 16/67  | 6.73 | 82.69  |
| 142 | Erlin-1                                                                       | Q91X78 | 76   | 24.00 | 8/12   | 6.73 | 39.08  |
| 143 | Erlin-2                                                                       | Q1RMU4 | 76   | 18.90 | 6/8    | 5.36 | 37.93  |
| 144 | Eukaryotic initiation factor 4A-III                                           | Q91VC3 | 493  | 40.10 | 15/24  | 6.30 | 47.10  |
| 145 | Eukaryotic peptide chain release factor GTP-binding subunit ERF3B             | Q149F3 | 55   | 12.30 | 8/10   | 5.11 | 69.79  |
| 146 | Eukaryotic translation initiation factor 2 subunit 3                          | P81795 | 62   | 17.80 | 8/17   | 8.66 | 51.62  |
| 147 | Eukaryotic translation initiation factor 2 subunit 3, Y-linked                | Q9Z0N2 | 65   | 14.40 | 6/15   | 8.76 | 51.67  |
| 148 | Eukaryotic translation initiation factor 3 subunit B                          | Q4G061 | 58   | 9.30  | 6/7    | 4.97 | 91.25  |
| 149 | Eukaryotic translation initiation factor 3 subunit C                          | B5DFC8 | 45   | 15.90 | 14/37  | 5.55 | 106.05 |
| 150 | Eukaryotic translation initiation factor 3 subunit D                          | Q4R8R4 | 87   | 15.10 | 10/15  | 5.78 | 64.52  |
| 151 | Eukaryotic translation initiation factor 3 subunit E                          | Q3T102 | 49   | 15.70 | 7/38   | 5.71 | 52.56  |
| 152 | Exosome complex exonuclease RRP44                                             | Q9Y2L1 | 42   | 8.70  | 7/27   | 6.69 | 110.02 |

Supplementary Table S1 (p. 5 of 12)

|     |                                                                            |        |      |       |       |      |        |
|-----|----------------------------------------------------------------------------|--------|------|-------|-------|------|--------|
| 153 | Exportin-1                                                                 | Q6P5F9 | 54   | 9.70  | 10/15 | 5.72 | 124.15 |
| 154 | Exportin-4                                                                 | Q9ESJ0 | 61   | 6.50  | 5/9   | 5.02 | 131.15 |
| 155 | Exportin-7                                                                 | Q9EPK7 | 55   | 10.00 | 10/53 | 5.96 | 125.16 |
| 156 | Exportin-T                                                                 | Q5RA02 | 113  | 6.70  | 7/9   | 5.27 | 111.14 |
| 157 | F-actin-capping protein subunit alpha-2                                    | Q108U5 | 1041 | 42.00 | 10/39 | 5.57 | 33.12  |
| 158 | Far upstream element-binding protein 2                                     | Q92945 | 153  | 22.10 | 11/16 | 6.85 | 73.36  |
| 159 | FAS-associated factor 2                                                    | Q96CS3 | 58   | 13.90 | 5/5   | 5.46 | 52.93  |
| 160 | Fatty acyl-CoA reductase 1                                                 | Q5R834 | 57   | 15.30 | 7/7   | 9.25 | 59.66  |
| 161 | Folate receptor beta                                                       | P14207 | 96   | 11.40 | 2/4   | 7.49 | 30.29  |
| 162 | Four and a half LIM domains protein 2                                      | Q2KI95 | 47   | 5.40  | 2/4   | 7.59 | 34.07  |
| 163 | Fragile X mental retardation protein 1                                     | Q06787 | 59   | 6.80  | 5/21  | 6.99 | 71.47  |
| 164 | Fragile X mental retardation syndrome-related protein 2                    | P51116 | 118  | 4.60  | 4/13  | 5.95 | 74.52  |
| 165 | Fructose-bisphosphate aldolase A                                           | P05064 | 79   | 7.40  | 3/3   | 8.31 | 39.79  |
| 166 | Galectin-8                                                                 | O00214 | 94   | 6.00  | 2/4   | 8.33 | 35.96  |
| 167 | GDP-mannose 4,6 dehydratase                                                | O60547 | 54   | 15.10 | 7/38  | 6.87 | 42.27  |
| 168 | GEM-interacting protein                                                    | Q6PGG2 | 36   | 9.70  | 10/12 | 5.54 | 108.68 |
| 169 | Glutamate dehydrogenase 1, mitochondrial                                   | P00367 | 106  | 12.40 | 8/9   | 7.66 | 61.70  |
| 170 | Glutamate dehydrogenase 2, mitochondrial                                   | Q64HZ8 | 87   | 12.40 | 7/9   | 8.49 | 61.74  |
| 171 | Glutamine--fructose-6-phosphate aminotransferase [isomerizing] 1           | Q06210 | 61   | 9.40  | 7/13  | 6.66 | 79.56  |
| 172 | Glutamine--fructose-6-phosphate aminotransferase [isomerizing] 2           | Q4KMC4 | 42   | 12.80 | 8/21  | 6.86 | 77.76  |
| 173 | Glutamine--tRNA ligase                                                     | Q3MHH4 | 64   | 8.30  | 6/13  | 6.43 | 88.44  |
| 174 | Glycogen debranching enzyme                                                | A8BQB4 | 50   | 7.10  | 11/25 | 6.24 | 176.49 |
| 175 | Glycosyltransferase-like domain-containing protein 1                       | Q8BW56 | 38   | 7.90  | 4/15  | 7.25 | 51.61  |
| 176 | Golgin subfamily B member 1                                                | Q14789 | 43   | 16.00 | 53/77 | 4.96 | 377.22 |
| 177 | Golgi-specific brefeldin A-resistance guanine nucleotide exchange factor 1 | Q9R1D7 | 49   | 5.40  | 10/19 | 5.48 | 208.17 |
| 178 | Granulins                                                                  | P28799 | 35   | 8.90  | 5/12  | 6.43 | 68.52  |
| 179 | GTP-binding nuclear protein Ran                                            | Q3T054 | 137  | 15.30 | 3/7   | 7.01 | 24.58  |
| 180 | Guanine nucleotide-binding protein G(i) subunit alpha-1                    | Q5R5W8 | 396  | 18.50 | 6/15  | 5.47 | 38.15  |
| 181 | Guanine nucleotide-binding protein G(I)/G(S)/G(T) subunit beta-1           | B2RSH2 | 598  | 26.30 | 9/22  | 5.69 | 40.91  |
| 182 | Guanine nucleotide-binding protein G(o) subunit alpha                      | P18872 | 502  | 9.90  | 3/15  | 5.34 | 40.63  |
| 183 | Guanine nucleotide-binding protein G(olf) subunit alpha                    | Q8CGK7 | 501  | 9.20  | 3/14  | 6.23 | 44.79  |
| 184 | Guanine nucleotide-binding protein G(q) subunit alpha                      | Q2PKF4 | 89   | 15.60 | 5/7   | 5.48 | 42.40  |
| 185 | Guanine nucleotide-binding protein G(t) subunit alpha-1                    | P04695 | 501  | 11.40 | 4/15  | 5.48 | 40.40  |
| 186 | Guanine nucleotide-binding protein subunit alpha-11                        | Q2XSV9 | 172  | 21.20 | 6/10  | 5.90 | 42.32  |
| 187 | Guanine nucleotide-binding protein subunit alpha-14                        | P38408 | 89   | 14.10 | 4/5   | 5.81 | 41.93  |
| 188 | Guanine nucleotide-binding protein subunit alpha-15                        | Q9TU29 | 89   | 8.60  | 3/6   | 8.68 | 43.36  |
| 189 | H(+)/Cl(-) exchange transporter 3                                          | Q5RDJ7 | 52   | 6.40  | 5/15  | 5.88 | 90.29  |
| 190 | H(+)/Cl(-) exchange transporter 5                                          | Q9GKE7 | 52   | 4.30  | 4/18  | 6.79 | 84.04  |
| 191 | H/ACA ribonucleoprotein complex subunit 4                                  | O60832 | 59   | 14.60 | 9/14  | 9.46 | 58.09  |
| 192 | Hedgehog-interacting protein                                               | Q7TN16 | 50   | 4.60  | 4/15  | 8.25 | 80.34  |
| 193 | Hepatocyte nuclear factor 1-beta                                           | P23899 | 118  | 15.40 | 7/8   | 7.38 | 61.56  |

Supplementary Table S1 (p. 6 of 12)

|     |                                                                             |        |      |       |        |       |        |
|-----|-----------------------------------------------------------------------------|--------|------|-------|--------|-------|--------|
| 194 | Heterogeneous nuclear ribonucleoprotein A1-like 2                           | Q32P51 | 633  | 25.90 | 8/33   | 9.08  | 34.38  |
| 195 | Heterogeneous nuclear ribonucleoprotein D0                                  | Q14103 | 384  | 9.00  | 3/20   | 7.62  | 38.58  |
| 196 | Heterogeneous nuclear ribonucleoprotein H2                                  | Q6AY09 | 1091 | 35.90 | 13/54  | 5.89  | 49.55  |
| 197 | Heterogeneous nuclear ribonucleoprotein K                                   | O19049 | 645  | 28.50 | 12/35  | 5.39  | 51.21  |
| 198 | Heterogeneous nuclear ribonucleoprotein L                                   | P14866 | 387  | 19.90 | 9/16   | 8.46  | 64.72  |
| 199 | Hexokinase-1                                                                | P17710 | 53   | 14.50 | 13/16  | 6.37  | 109.55 |
| 200 | Hexokinase-2                                                                | P52789 | 97   | 12.30 | 9/22   | 5.71  | 103.74 |
| 201 | Hexokinase-3                                                                | P52790 | 53   | 10.00 | 8/12   | 5.23  | 100.62 |
| 202 | Histone acetyltransferase KAT2B                                             | Q92831 | 54   | 10.00 | 8/12   | 9.16  | 94.04  |
| 203 | Histone deacetylase 1                                                       | Q3MHL3 | 128  | 13.90 | 4/6    | 4.74  | 47.91  |
| 204 | Histone deacetylase 2                                                       | Q4R304 | 125  | 14.80 | 4/6    | 4.89  | 48.13  |
| 205 | Histone H1.1                                                                | Q4QQW4 | 46   | 11.20 | 6/15   | 5.31  | 55.63  |
| 206 | Histone H1.2                                                                | P70288 | 46   | 7.20  | 5/7    | 5.59  | 55.84  |
| 207 | Histone H1.3                                                                | G3N131 | 116  | 11.90 | 4/9    | 10.93 | 22.09  |
| 208 | Histone H1t                                                                 | P16403 | 116  | 18.30 | 5/10   | 10.94 | 21.35  |
| 209 | Histone H2AX                                                                | P43277 | 116  | 20.40 | 6/11   | 11.03 | 22.09  |
| 210 | Histone H2B type F-S                                                        | P06348 | 116  | 11.80 | 4/10   | 11.58 | 22.05  |
| 211 | Histone H3.3C                                                               | P27661 | 564  | 12.60 | 2/39   | 10.74 | 15.13  |
| 212 | Histone-binding protein RBBP4                                               | P57053 | 412  | 35.70 | 5/44   | 10.37 | 13.94  |
| 213 | Histone-binding protein RBBP7                                               | A5PK61 | 156  | 31.60 | 4/19   | 11.48 | 15.42  |
| 214 | Histone-lysine N-methyltransferase 2A                                       | Q03164 | 41   | 6.80  | 28/119 | 9.22  | 436.06 |
| 215 | Homeobox-containing protein 1                                               | Q6NT76 | 49   | 8.10  | 3/4    | 5.72  | 47.42  |
| 216 | Importin subunit beta-1                                                     | P52296 | 400  | 16.20 | 13/27  | 4.66  | 98.37  |
| 217 | Insulin-like growth factor 2 mRNA-binding protein 1                         | Q9NZI8 | 825  | 35.90 | 21/49  | 9.26  | 63.78  |
| 218 | Insulin-like growth factor 2 mRNA-binding protein 2                         | Q5SF07 | 378  | 11.00 | 6/21   | 7.81  | 65.66  |
| 219 | Insulin-like growth factor 2 mRNA-binding protein 3                         | O00425 | 326  | 10.50 | 6/16   | 8.99  | 64.01  |
| 220 | Integrin alpha-2 (Fragment)                                                 | P53710 | 37   | 6.90  | 7/22   | 5.47  | 130.16 |
| 221 | Integrin beta-4                                                             | P16144 | 58   | 8.70  | 13/24  | 5.74  | 205.75 |
| 222 | Interferon-induced protein with tetratricopeptide repeats 2                 | Q60462 | 65   | 14.70 | 6/88   | 8.73  | 55.58  |
| 223 | Isocitrate dehydrogenase [NAD] subunit beta, mitochondrial                  | Q28479 | 122  | 27.50 | 7/13   | 8.45  | 42.51  |
| 224 | Kelch domain-containing protein 7A                                          | A2APT9 | 48   | 5.00  | 4/6    | 5.92  | 84.91  |
| 225 | Kelch-like ECH-associated protein 1                                         | Q9Z2X8 | 86   | 12.50 | 8/22   | 6.00  | 70.93  |
| 226 | Kelch-like protein 7                                                        | Q5XHZ6 | 124  | 17.40 | 10/13  | 6.19  | 67.07  |
| 227 | Kelch-like protein 9                                                        | Q2T9Z7 | 48   | 12.00 | 7/13   | 5.92  | 70.21  |
| 228 | KH domain-containing, RNA-binding, signal transduction-associated protein 1 | Q07666 | 101  | 12.00 | 7/16   | 8.73  | 48.31  |
| 229 | Kinesin-like protein KIF12                                                  | Q9D2Z8 | 114  | 10.90 | 9/17   | 8.94  | 71.69  |
| 230 | Kinesin-like protein KIF13B                                                 | Q9NQT8 | 64   | 11.80 | 18/164 | 5.64  | 203.97 |
| 231 | Kinesin-like protein KIF1A                                                  | Q12756 | 64   | 13.00 | 22/41  | 5.86  | 192.54 |
| 232 | Kinesin-like protein KIF1B                                                  | Q60575 | 64   | 15.20 | 28/41  | 5.43  | 205.32 |
| 233 | Kinesin-like protein KIF1C                                                  | O43896 | 64   | 17.60 | 19/30  | 6.47  | 123.73 |
| 234 | Kinesin-like protein KIF20A                                                 | Q29RT6 | 52   | 8.30  | 8/8    | 6.55  | 101.01 |

Supplementary Table S1 (p. 7 of 12)

|     |                                                                       |        |     |       |       |       |        |
|-----|-----------------------------------------------------------------------|--------|-----|-------|-------|-------|--------|
| 235 | Kinesin-like protein KIF2B                                            | Q95LT1 | 56  | 15.80 | 10/11 | 9.14  | 76.44  |
| 236 | Kinesin-like protein KIF2C                                            | P70096 | 56  | 10.70 | 8/9   | 8.05  | 81.72  |
| 237 | Kinesin-like protein KIFC1                                            | Q9BW19 | 68  | 15.80 | 11/25 | 9.15  | 74.27  |
| 238 | Lamin-B2                                                              | P21619 | 55  | 22.00 | 16/58 | 5.40  | 67.39  |
| 239 | Lebercilin-like protein                                               | O95447 | 49  | 10.00 | 8/11  | 9.51  | 76.86  |
| 240 | Leucine zipper putative tumor suppressor 1                            | P62046 | 181 | 9.20  | 9/22  | 5.74  | 79.94  |
| 241 | Leucine zipper putative tumor suppressor 3                            | Q3UMG5 | 34  | 2.20  | 2/4   | 6.14  | 85.73  |
| 242 | Leucine-rich repeat and calponin homology domain-containing protein 1 | Q9D5S7 | 49  | 3.00  | 3/6   | 5.89  | 93.76  |
| 243 | Leucine-rich repeat and calponin homology domain-containing protein 2 | Q5RJR8 | 40  | 11.40 | 4/5   | 9.57  | 35.30  |
| 244 | Leucine-rich repeat and guanylate kinase domain-containing protein    | Q9Y250 | 55  | 14.90 | 10/13 | 6.64  | 66.97  |
| 245 | Leucine-rich repeat-containing protein 59                             | O60299 | 119 | 20.40 | 13/59 | 7.56  | 72.26  |
| 246 | Lipid phosphate phosphatase-related protein type 1                    | Q6WAY2 | 47  | 5.20  | 2/10  | 6.24  | 36.60  |
| 247 | Long-chain-fatty-acid--CoA ligase 3                                   | Q5R668 | 154 | 17.40 | 12/23 | 8.71  | 81.36  |
| 248 | Long-chain-fatty-acid--CoA ligase 4                                   | Q9QUJ7 | 85  | 13.50 | 10/14 | 8.57  | 80.22  |
| 249 | Lymphoid-specific helicase                                            | Q9NRZ9 | 43  | 12.20 | 10/19 | 8.07  | 97.64  |
| 250 | Lysine-specific demethylase 7A                                        | Q3UWM4 | 44  | 4.40  | 5/15  | 8.05  | 107.32 |
| 251 | Lysozyme g-like protein 2                                             | Q3V1I0 | 44  | 12.20 | 2/2   | 8.64  | 23.97  |
| 252 | Major vault protein                                                   | Q5R9N2 | 37  | 10.60 | 9/13  | 5.36  | 99.46  |
| 253 | MAP/microtubule affinity-regulating kinase 3                          | P27448 | 45  | 10.00 | 7/10  | 9.59  | 84.95  |
| 254 | Maternal embryonic leucine zipper kinase                              | Q14680 | 52  | 8.60  | 8/66  | 8.92  | 75.51  |
| 255 | Membrane progesterin receptor beta                                    | Q8TEZ7 | 39  | 4.20  | 2/3   | 8.69  | 41.24  |
| 256 | Metastasis-associated protein MTA1                                    | Q8K4B0 | 38  | 7.40  | 5/13  | 9.37  | 81.43  |
| 257 | Metastasis-associated protein MTA2                                    | Q9R190 | 38  | 21.90 | 12/33 | 9.71  | 75.72  |
| 258 | Metastasis-associated protein MTA3                                    | Q9BTC8 | 38  | 9.60  | 6/18  | 8.80  | 68.20  |
| 259 | Methionine--tRNA ligase, cytoplasmic                                  | Q68FL6 | 117 | 13.00 | 12/18 | 6.78  | 102.74 |
| 260 | Methylcrotonoyl-CoA carboxylase beta chain, mitochondrial             | Q5XIT9 | 68  | 8.30  | 4/8   | 8.56  | 61.99  |
| 261 | Misshapen-like kinase 1                                               | Q9JM52 | 43  | 8.10  | 10/22 | 7.07  | 147.89 |
| 262 | Mitochondrial glutamate carrier 1                                     | Q08DK4 | 85  | 16.80 | 5/17  | 9.42  | 34.97  |
| 263 | Mitochondrial glutamate carrier 2                                     | Q9H1K4 | 85  | 9.80  | 4/5   | 9.39  | 34.34  |
| 264 | Mitochondrial Rho GTPase 1                                            | Q2HJF8 | 47  | 5.20  | 4/9   | 6.02  | 73.06  |
| 265 | Mitogen-activated protein kinase kinase kinase 4                      | O95819 | 43  | 8.10  | 12/48 | 7.09  | 142.75 |
| 266 | Mitotic checkpoint protein BUB3                                       | Q1JQB2 | 69  | 16.60 | 5/8   | 6.36  | 37.33  |
| 267 | Mitotic interactor and substrate of PLK1                              | Q8IVT2 | 62  | 12.10 | 9/16  | 6.36  | 75.48  |
| 268 | MKI67 FHA domain-interacting nucleolar phosphoprotein                 | Q3SZM1 | 45  | 22.60 | 6/7   | 10.05 | 34.25  |
| 269 | Mothers against decapentaplegic homolog 2                             | Q1W668 | 60  | 9.90  | 3/3   | 6.24  | 53.11  |
| 270 | Mothers against decapentaplegic homolog 3                             | Q8BUN5 | 60  | 8.70  | 3/4   | 6.73  | 48.91  |
| 271 | Mothers against decapentaplegic homolog 9                             | Q9JIW5 | 60  | 9.50  | 4/5   | 8.49  | 49.57  |
| 272 | Myeloid differentiation primary response protein MyD88                | Q99836 | 48  | 8.80  | 3/4   | 5.89  | 33.73  |
| 273 | Myosin light chain 1/3, skeletal muscle isoform                       | P02600 | 88  | 33.30 | 4/9   | 4.99  | 20.78  |
| 274 | N-acetyltransferase 10                                                | Q9H0A0 | 65  | 11.00 | 13/39 | 8.50  | 116.57 |
| 275 | NCK-interacting protein with SH3 domain                               | Q9NZQ3 | 67  | 8.70  | 6/6   | 5.94  | 79.65  |

|     |                                                            |               |           |              |              |             |               |
|-----|------------------------------------------------------------|---------------|-----------|--------------|--------------|-------------|---------------|
| 276 | Neurobeachin-like protein 2                                | Q6ZNJ1        | 43        | 4.70         | 13/31        | 5.95        | 305.41        |
| 277 | Neurofilament light polypeptide                            | P02547        | 615       | 11.80        | 6/70         | 4.64        | 62.09         |
| 278 | Neuron navigator 3                                         | Q8IVL0        | 41        | 9.50         | 20/50        | 8.92        | 256.97        |
| 279 | Neuropeptide Y receptor type 5                             | O97969        | 39        | 1.60         | 1/2          | 9.21        | 51.30         |
| 280 | NF-kappa-B-repressing factor                               | O15226        | 61        | 15.20        | 10/15        | 8.94        | 78.31         |
| 281 | Niban-like protein 1                                       | Q8R1F1        | 103       | 10.50        | 8/19         | 5.65        | 85.39         |
| 282 | Nuclear cap-binding protein subunit 1                      | Q09161        | 65        | 11.10        | 8/11         | 5.99        | 92.86         |
| 283 | Nuclear fragile X mental retardation-interacting protein 2 | Q7Z417        | 51        | 16.30        | 9/13         | 8.70        | 76.13         |
| 284 | Nuclear pore complex protein Nup93                         | Q8BJ71        | 452       | 28.30        | 23/41        | 5.50        | 93.74         |
| 285 | Nuclear receptor coactivator 5                             | Q9HCD5        | 71        | 11.90        | 7/12         | 9.62        | 65.73         |
| 286 | Nuclease-sensitive element-binding protein 1               | Q28618        | 139       | 19.80        | 3/4          | 9.82        | 35.80         |
| 287 | Nucleolar protein 6                                        | Q9H6R4        | 47        | 4.00         | 5/7          | 7.42        | 128.37        |
| 288 | Nucleolar transcription factor 1                           | P17480        | 88        | 17.80        | 12/14        | 5.63        | 89.69         |
| 289 | Nucleolysin TIAR                                           | P70318        | 40        | 19.10        | 6/12         | 8.11        | 43.70         |
| 290 | Nucleophosmin                                              | Q3T160        | 137       | 21.40        | 7/18         | 4.62        | 32.85         |
| 291 | Olfactory receptor 6N2                                     | Q8NGY6        | 46        | 4.70         | 2/11         | 9.08        | 36.35         |
| 292 | Ornithine aminotransferase, mitochondrial                  | P29758        | 53        | 9.60         | 5/9          | 6.19        | 48.72         |
| 293 | Pachytene checkpoint protein 2 homolog                     | E2R222        | 87        | 7.90         | 3/3          | 5.83        | 48.92         |
| 294 | Parafibromin                                               | Q4V8C8        | 55        | 24.30        | 12/13        | 9.63        | 60.68         |
| 295 | PCI domain-containing protein 2                            | Q2TBN6        | 120       | 24.30        | 7/13         | 8.94        | 47.41         |
| 296 | PDZ and LIM domain protein 7                               | Q9Z1Z9        | 190       | 17.10        | 9/16         | 8.82        | 50.96         |
| 297 | PDZ domain-containing protein GIPC1                        | O14908        | 469       | 31.20        | 14/33        | 5.90        | 36.14         |
| 298 | Pericentriolar material 1 protein                          | Q9R0L6        | 46        | 8.20         | 17/37        | 4.94        | 230.13        |
| 299 | Phosphatidylinositol-binding clathrin assembly protein     | Q7M6Y3        | 49        | 10.60        | 5/7          | 7.71        | 71.67         |
| 300 | Phosphoacetylglucosamine mutase                            | Q9CYR6        | 48        | 15.90        | 10/29        | 5.80        | 60.04         |
| 301 | <b>Plasma membrane calcium-transporting ATPase 2</b>       | <b>Q01814</b> | <b>86</b> | <b>10.00</b> | <b>28/12</b> | <b>5.66</b> | <b>137.98</b> |
| 302 | Poly(A) polymerase alpha                                   | P51003        | 48        | 13.00        | 9/21         | 6.96        | 83.25         |
| 303 | Poly(A) polymerase beta                                    | Q9WVP6        | 48        | 8.60         | 7/18         | 6.28        | 72.50         |
| 304 | Poly(rC)-binding protein 3                                 | P57721        | 148       | 17.50        | 5/7          | 8.22        | 39.73         |
| 305 | Polyadenylate-binding protein 1-like                       | Q4VXU2        | 311       | 21.70        | 13/24        | 9.06        | 68.98         |
| 306 | Polyadenylate-binding protein 4-like                       | P0CB38        | 44        | 8.10         | 3/5          | 9.53        | 42.06         |
| 307 | Polymerase delta-interacting protein 3                     | Q9BY77        | 79        | 16.60        | 5/5          | 10.00       | 46.29         |
| 308 | Polypyrimidine tract-binding protein 2                     | Q9UKA9        | 134       | 6.20         | 3/12         | 8.72        | 57.57         |
| 309 | Polypyrimidine tract-binding protein 3                     | O95758        | 134       | 6.90         | 4/18         | 9.13        | 59.94         |
| 310 | Polyubiquitin-B                                            | P0CG47        | 1041      | 27.50        | 8/55         | 6.86        | 25.80         |
| 311 | Potassium-transporting ATPase alpha chain 2                | P54708        | 46        | 7.80         | 8/25         | 6.16        | 115.64        |
| 312 | POTE ankyrin domain family member F                        | A5A3E0        | 12372     | 21.50        | 21/389       | 5.83        | 123.02        |
| 313 | POTE ankyrin domain family member J                        | P0CG39        | 4948      | 20.40        | 20/236       | 5.66        | 118.74        |
| 314 | Pre-mRNA-processing factor 19                              | Q08E38        | 99        | 15.70        | 6/7          | 6.14        | 55.62         |
| 315 | Probable ATP-dependent RNA helicase DDX20                  | Q9JJY4        | 52        | 5.90         | 4/30         | 6.30        | 92.57         |
| 316 | Probable ATP-dependent RNA helicase DDX4                   | Q4R5S7        | 86        | 9.90         | 6/8          | 5.56        | 80.03         |



|     |                                                                            |        |     |       |       |      |        |
|-----|----------------------------------------------------------------------------|--------|-----|-------|-------|------|--------|
| 317 | Probable ATP-dependent RNA helicase DDX47                                  | Q29S22 | 64  | 14.70 | 7/9   | 9.21 | 51.22  |
| 318 | Probable helicase senataxin                                                | A2AKX3 | 47  | 7.50  | 20/41 | 6.41 | 301.62 |
| 319 | Probable RNA-binding protein 46                                            | Q4R2Z0 | 44  | 13.60 | 6/10  | 7.94 | 55.77  |
| 320 | Programmed cell death 6-interacting protein (Alix)                         | Q8WUM4 | 146 | 17.70 | 15/40 | 6.13 | 96.59  |
| 321 | Proliferating cell nuclear antigen                                         | Q3ZBW4 | 118 | 16.10 | 4/5   | 4.57 | 29.07  |
| 322 | Protein argonaute-2                                                        | Q8CJG0 | 56  | 15.10 | 14/24 | 9.32 | 98.50  |
| 323 | Protein CYR61                                                              | A5A6L1 | 52  | 13.40 | 5/11  | 8.64 | 44.15  |
| 324 | Protein FAM83B                                                             | Q0VBM2 | 146 | 11.30 | 10/17 | 9.19 | 115.12 |
| 325 | Protein kinase C delta type                                                | Q05655 | 159 | 19.20 | 7/11  | 5.46 | 27.84  |
| 326 | Protein PRRC2A                                                             | Q6MG48 | 36  | 11.40 | 17/43 | 9.47 | 229.42 |
| 327 | Protein RCC2                                                               | Q9P258 | 38  | 9.00  | 5/10  | 9.02 | 56.79  |
| 328 | Protein TBRG4                                                              | Q7YS91 | 53  | 11.70 | 8/8   | 9.26 | 71.63  |
| 329 | Protein TFG                                                                | Q92734 | 140 | 23.30 | 5/9   | 4.94 | 43.48  |
| 330 | Protein transport protein Sec23B                                           | Q9D662 | 52  | 10.40 | 8/13  | 6.51 | 87.29  |
| 331 | Protein zyg-11 homolog B                                                   | Q9C0D3 | 104 | 11.20 | 8/17  | 6.38 | 84.95  |
| 332 | Protein-lysine 6-oxidase                                                   | P28300 | 170 | 16.30 | 5/13  | 8.36 | 47.60  |
| 333 | Puromycin-sensitive aminopeptidase-like protein                            | A6NEC2 | 159 | 18.60 | 11/18 | 5.17 | 54.23  |
| 334 | Putative endoplasmin-like protein                                          | Q58FF3 | 55  | 4.80  | 2/4   | 5.14 | 46.34  |
| 335 | Putative eukaryotic translation initiation factor 2 subunit 3-like protein | Q2VIR3 | 62  | 14.60 | 6/15  | 8.67 | 51.77  |
| 336 | Putative heat shock 70 kDa protein 7                                       | P48741 | 952 | 17.70 | 5/28  | 7.72 | 40.45  |
| 337 | Putative heat shock protein HSP 90-alpha A2                                | Q14568 | 337 | 16.90 | 6/15  | 4.57 | 39.45  |
| 338 | Putative heat shock protein HSP 90-alpha A5                                | Q58FG0 | 50  | 17.70 | 6/18  | 6.15 | 38.94  |
| 339 | Putative heat shock protein HSP 90-beta 4                                  | Q58FF6 | 56  | 16.80 | 7/9   | 4.65 | 58.86  |
| 340 | Putative pre-mRNA-splicing factor ATP-dependent RNA helicase DHX16         | Q767K6 | 41  | 12.00 | 12/19 | 6.03 | 120.26 |
| 341 | Pyruvate dehydrogenase E1 component subunit beta, mitochondrial            | P11966 | 108 | 22.30 | 7/11  | 6.21 | 39.44  |
| 342 | Rab GDP dissociation inhibitor beta                                        | Q5RCE1 | 40  | 17.80 | 10/12 | 6.11 | 51.09  |
| 343 | Rab11 family-interacting protein 1                                         | Q9D620 | 117 | 14.10 | 8/15  | 9.47 | 70.70  |
| 344 | Rac GTPase-activating protein 1                                            | Q9H0H5 | 54  | 15.80 | 9/12  | 9.08 | 71.67  |
| 345 | RAF proto-oncogene serine/threonine-protein kinase                         | A7E3S4 | 86  | 20.10 | 10/19 | 9.33 | 73.63  |
| 346 | RalA-binding protein 1                                                     | Q62796 | 44  | 14.20 | 12/35 | 5.65 | 75.66  |
| 347 | Ran GTPase-activating protein 1                                            | P46060 | 51  | 19.10 | 9/12  | 4.63 | 63.96  |
| 348 | Ras GTPase-activating protein-binding protein 1                            | Q5RB87 | 141 | 13.90 | 5/15  | 5.36 | 52.22  |
| 349 | Ras GTPase-activating protein-binding protein 2                            | P97379 | 86  | 16.60 | 7/10  | 5.44 | 54.11  |
| 350 | Ras GTPase-activating-like protein IQGAP1                                  | P46940 | 66  | 11.50 | 18/70 | 6.08 | 189.76 |
| 351 | Ras-related C3 botulinum toxin substrate 1                                 | Q6RUV5 | 90  | 12.50 | 2/6   | 8.77 | 21.84  |
| 352 | Ras-related C3 botulinum toxin substrate 3                                 | P60763 | 90  | 11.50 | 2/6   | 8.43 | 21.76  |
| 353 | Ras-related protein Rab-1A                                                 | Q6NYB7 | 124 | 33.70 | 5/7   | 5.93 | 22.89  |
| 354 | Ras-related protein Rab-26                                                 | Q29RR0 | 56  | 9.00  | 3/3   | 9.36 | 27.96  |
| 355 | Ras-related protein Rab-37                                                 | Q96AX2 | 56  | 26.50 | 5/5   | 5.97 | 25.03  |
| 356 | Ras-related protein Rab-39B                                                | Q17QU4 | 56  | 19.20 | 4/5   | 7.70 | 24.82  |
| 357 | Ras-related protein Rab-5A                                                 | Q0IIG7 | 103 | 10.70 | 2/3   | 8.32 | 23.90  |

Supplementary Table S1 (p. 10 of 12)

|     |                                                                                   |        |     |       |        |       |        |
|-----|-----------------------------------------------------------------------------------|--------|-----|-------|--------|-------|--------|
| 358 | Regulator of chromosome condensation                                              | Q8VE37 | 42  | 13.10 | 5/5    | 8.34  | 45.36  |
| 359 | Replication factor C subunit 2                                                    | Q9WUK4 | 97  | 14.90 | 5/7    | 6.04  | 39.16  |
| 360 | Replication factor C subunit 4                                                    | Q99J62 | 71  | 17.00 | 6/8    | 6.29  | 40.36  |
| 361 | Replication factor C subunit 5                                                    | Q9D0F6 | 154 | 19.80 | 8/21   | 7.67  | 38.36  |
| 362 | Replication protein A 70 kDa DNA-binding subunit                                  | Q5R7Q4 | 108 | 14.40 | 8/16   | 6.86  | 68.71  |
| 363 | Rhotekin                                                                          | Q6V7V2 | 55  | 17.90 | 7/14   | 6.13  | 61.86  |
| 364 | Ribonucleoside-diphosphate reductase large subunit                                | Q5R919 | 64  | 13.60 | 10/17  | 6.76  | 90.88  |
| 365 | Ribosome biogenesis protein BOP1                                                  | Q14137 | 59  | 9.70  | 7/9    | 5.80  | 84.26  |
| 366 | RNA 3'-terminal phosphate cyclase-like protein                                    | Q2KHX8 | 51  | 9.90  | 3/6    | 9.37  | 41.44  |
| 367 | RNA-binding protein 47                                                            | Q9XSR3 | 74  | 12.50 | 6/11   | 8.21  | 63.94  |
| 368 | RNA-binding protein Raly                                                          | Q64012 | 404 | 27.20 | 9/20   | 8.94  | 33.34  |
| 369 | Rootletin                                                                         | Q5TZA2 | 90  | 23.40 | 49/227 | 5.45  | 228.79 |
| 370 | RuvB-like 1                                                                       | Q9Y265 | 64  | 22.60 | 10/11  | 6.02  | 50.54  |
| 371 | RuvB-like 2                                                                       | Q2TBU9 | 205 | 18.40 | 8/14   | 5.57  | 51.31  |
| 372 | S-adenosylmethionine synthase isoform type-1                                      | P13444 | 92  | 12.80 | 4/12   | 5.61  | 44.24  |
| 373 | S-adenosylmethionine synthase isoform type-2                                      | Q3THS6 | 315 | 31.90 | 12/30  | 6.02  | 44.00  |
| 374 | Septin-10                                                                         | Q8C650 | 72  | 9.70  | 5/6    | 6.17  | 53.19  |
| 375 | Septin-11                                                                         | B3GNI6 | 72  | 15.10 | 8/13   | 6.24  | 50.01  |
| 376 | Septin-14                                                                         | Q9DA97 | 72  | 8.60  | 3/5    | 6.85  | 50.24  |
| 377 | Septin-6                                                                          | Q3SZN0 | 72  | 11.20 | 6/9    | 6.35  | 49.09  |
| 378 | Septin-7                                                                          | Q9WVC0 | 72  | 16.30 | 8/14   | 8.82  | 50.82  |
| 379 | Septin-8                                                                          | B1MTN8 | 72  | 4.70  | 2/3    | 5.84  | 50.05  |
| 380 | Septin-9                                                                          | Q9QZR6 | 33  | 7.80  | 5/6    | 8.65  | 64.09  |
| 381 | Sequestosome-1                                                                    | Q5RBA5 | 106 | 7.50  | 3/10   | 5.15  | 48.38  |
| 382 | Serine hydroxymethyltransferase, mitochondrial                                    | P14519 | 201 | 17.10 | 8/15   | 8.78  | 56.32  |
| 383 | Serine/arginine-rich splicing factor 2                                            | Q3MHR5 | 53  | 7.20  | 2/6    | 11.86 | 25.46  |
| 384 | Serine/arginine-rich splicing factor 8                                            | Q9BRL6 | 53  | 18.10 | 5/5    | 11.72 | 32.38  |
| 385 | Serine/threonine-protein kinase A-Raf                                             | P10398 | 76  | 11.10 | 6/12   | 9.20  | 68.34  |
| 386 | Serine/threonine-protein kinase B-raf                                             | P15056 | 86  | 11.00 | 8/21   | 7.29  | 85.13  |
| 387 | Serine/threonine-protein kinase MARK1                                             | Q9P0L2 | 45  | 16.10 | 11/18  | 9.42  | 89.46  |
| 388 | Serine/threonine-protein kinase MARK2                                             | Q7KZI7 | 270 | 26.80 | 19/34  | 9.73  | 88.26  |
| 389 | Serine/threonine-protein kinase MRCK beta                                         | Q9Y5S2 | 57  | 10.00 | 18/44  | 5.97  | 196.19 |
| 390 | Serine/threonine-protein kinase Nek5                                              | Q6P3R8 | 44  | 7.80  | 6/14   | 9.05  | 82.36  |
| 391 | Serine/threonine-protein kinase PAK 2                                             | Q8CIN4 | 64  | 17.70 | 7/14   | 5.57  | 58.18  |
| 392 | Serine/threonine-protein kinase PLK1                                              | P53350 | 49  | 12.40 | 7/8    | 9.08  | 68.95  |
| 393 | Serine/threonine-protein phosphatase 2A 55 kDa regulatory subunit B alpha isoform | Q4R7Z4 | 71  | 12.50 | 4/4    | 5.82  | 52.17  |
| 394 | Serine/threonine-protein phosphatase 2A 65 kDa regulatory subunit A alpha isoform | Q76MZ3 | 116 | 11.70 | 6/8    | 5.00  | 66.08  |
| 395 | Serine/threonine-protein phosphatase 6 catalytic subunit                          | Q9CQR6 | 53  | 11.80 | 3/3    | 5.43  | 35.82  |
| 396 | Serine/threonine-protein phosphatase PP1-alpha catalytic subunit                  | Q3T0E7 | 644 | 40.60 | 14/35  | 5.94  | 38.23  |
| 397 | Serine/threonine-protein phosphatase PP1-beta catalytic subunit                   | Q3SWW9 | 599 | 28.40 | 10/27  | 5.84  | 37.96  |
| 398 | Serine/threonine-protein phosphatase PP1-gamma catalytic subunit                  | Q8MJ46 | 546 | 31.60 | 11/26  | 6.13  | 37.73  |

Supplementary Table S1 (p. 11 of 12)

|     |                                                                          |        |     |       |       |       |        |
|-----|--------------------------------------------------------------------------|--------|-----|-------|-------|-------|--------|
| 399 | SH3 domain-binding protein 4                                             | Q9P0V3 | 70  | 11.90 | 11/22 | 7.78  | 108.40 |
| 400 | Small nuclear ribonucleoprotein-associated protein N                     | Q17QN3 | 57  | 19.20 | 6/10  | 11.20 | 24.78  |
| 401 | Smoothelin                                                               | P53814 | 52  | 18.00 | 15/30 | 9.20  | 99.51  |
| 402 | SNW domain-containing protein 1                                          | Q5R7R9 | 93  | 28.40 | 13/18 | 9.53  | 61.48  |
| 403 | Sodium/potassium-transporting ATPase subunit alpha-2                     | A2VDL6 | 52  | 11.40 | 10/38 | 5.47  | 113.42 |
| 404 | Sodium/potassium-transporting ATPase subunit alpha-3                     | Q6PIC6 | 48  | 13.80 | 13/23 | 5.26  | 113.05 |
| 405 | Sodium/potassium-transporting ATPase subunit alpha-4                     | Q13733 | 46  | 7.90  | 7/11  | 6.23  | 115.12 |
| 406 | Solute carrier family 2, facilitated glucose transporter member 1        | P11166 | 44  | 2.80  | 2/3   | 8.93  | 54.39  |
| 407 | Solute carrier family 22 member 4                                        | A9CB25 | 42  | 6.40  | 3/33  | 6.85  | 62.77  |
| 408 | Sorting nexin-2                                                          | Q9CWK8 | 71  | 22.40 | 10/22 | 5.04  | 58.55  |
| 409 | Spermatid perinuclear RNA-binding protein                                | Q9JKU6 | 72  | 23.40 | 14/18 | 8.86  | 74.76  |
| 410 | Spliceosome RNA helicase DDX39B                                          | Q3T147 | 49  | 16.40 | 9/14  | 5.44  | 49.39  |
| 411 | Splicing factor 3B subunit 2                                             | Q13435 | 46  | 15.10 | 11/29 | 5.52  | 100.28 |
| 412 | Splicing factor, proline- and glutamine-rich                             | P23246 | 329 | 14.90 | 10/14 | 9.45  | 76.22  |
| 413 | Src substrate cortactin                                                  | Q60598 | 494 | 21.20 | 15/55 | 5.24  | 61.38  |
| 414 | SRSF protein kinase 1                                                    | O70551 | 46  | 9.60  | 5/8   | 5.82  | 73.67  |
| 415 | Stomatin-like protein 3                                                  | Q6PE84 | 37  | 16.70 | 5/20  | 9.00  | 31.80  |
| 416 | Structural maintenance of chromosomes protein 2                          | O95347 | 141 | 23.30 | 27/41 | 8.54  | 136.09 |
| 417 | Succinate dehydrogenase [ubiquinone] flavoprotein subunit, mitochondrial | Q8HXW3 | 160 | 16.00 | 10/12 | 7.56  | 73.95  |
| 418 | SUN domain-containing protein 2                                          | Q8BJS4 | 65  | 12.40 | 9/15  | 6.54  | 81.73  |
| 419 | Superkiller viralicidic activity 2-like 2                                | Q9CZU3 | 59  | 13.10 | 14/19 | 6.01  | 118.59 |
| 420 | Synaptic vesicle membrane protein VAT-1 homolog                          | Q99536 | 102 | 13.20 | 4/14  | 5.88  | 42.12  |
| 421 | Synaptotagmin-like protein 3                                             | Q99N48 | 37  | 11.40 | 8/23  | 9.54  | 69.72  |
| 422 | Syntaxin-binding protein 2                                               | Q28288 | 57  | 5.60  | 3/4   | 6.38  | 66.91  |
| 423 | Talin-1                                                                  | Q9Y490 | 42  | 9.00  | 21/28 | 5.77  | 271.77 |
| 424 | TAR DNA-binding protein 43                                               | Q5R5W2 | 77  | 5.60  | 2/2   | 5.85  | 45.03  |
| 425 | Targeting protein for Xklp2                                              | Q9ULW0 | 162 | 22.20 | 16/28 | 9.29  | 86.23  |
| 426 | TATA box-binding protein-like protein 2                                  | A6H907 | 45  | 11.70 | 4/6   | 6.05  | 41.82  |
| 427 | Tax1-binding protein 1 homolog                                           | Q2KJE0 | 90  | 14.40 | 11/21 | 5.34  | 94.86  |
| 428 | T-complex protein 1 subunit beta                                         | Q5XIM9 | 147 | 28.40 | 12/33 | 6.01  | 57.76  |
| 429 | T-complex protein 1 subunit eta                                          | Q99832 | 257 | 27.40 | 16/30 | 7.55  | 59.84  |
| 430 | T-complex protein 1 subunit zeta                                         | Q3MHL7 | 63  | 19.60 | 11/19 | 6.32  | 58.38  |
| 431 | T-complex protein 1 subunit zeta-2                                       | Q3T084 | 53  | 11.50 | 6/10  | 7.60  | 58.51  |
| 432 | Testin                                                                   | Q2QLG8 | 48  | 22.60 | 11/18 | 7.96  | 49.66  |
| 433 | TOM1-like protein 2                                                      | Q6ZVM7 | 62  | 12.80 | 5/6   | 4.69  | 55.86  |
| 434 | TRAF2 and NCK-interacting protein kinase                                 | Q9UKE5 | 43  | 5.80  | 9/60  | 6.70  | 155.36 |
| 435 | Transcription termination factor 2                                       | Q5NC05 | 35  | 5.80  | 8/88  | 9.08  | 126.71 |
| 436 | Transducin beta-like protein 3                                           | Q12788 | 59  | 4.30  | 3/7   | 6.44  | 90.35  |
| 437 | Transketolase-like protein 1                                             | Q99MX0 | 54  | 8.20  | 3/3   | 5.67  | 66.34  |
| 438 | Translocon-associated protein subunit alpha                              | Q5R4X4 | 59  | 2.70  | 1/2   | 4.44  | 32.84  |
| 439 | Transportin-3                                                            | Q9Y5L0 | 98  | 8.20  | 8/14  | 5.35  | 105.96 |

Supplementary Table S1 (p. 12 of 12)

|     |                                                      |        |      |       |        |       |        |
|-----|------------------------------------------------------|--------|------|-------|--------|-------|--------|
| 440 | Trifunctional enzyme subunit beta, mitochondrial     | Q99JY0 | 263  | 17.50 | 8/26   | 9.43  | 51.64  |
| 441 | tRNA-splicing ligase RtcB homolog                    | Q5E9T9 | 246  | 27.30 | 13/22  | 6.77  | 55.68  |
| 442 | Tropomodulin-1                                       | P28289 | 138  | 11.10 | 4/31   | 5.03  | 40.66  |
| 443 | Tropomodulin-2                                       | Q9JKK7 | 613  | 9.40  | 3/48   | 5.28  | 39.49  |
| 444 | Tubulin alpha chain-like 3                           | A6NHL2 | 380  | 11.70 | 5/40   | 5.68  | 50.68  |
| 445 | Tubulin alpha-3 chain                                | Q68FR8 | 2855 | 40.00 | 15/112 | 4.97  | 50.61  |
| 446 | Tubulin beta-2A chain                                | Q4R5B3 | 6253 | 45.60 | 21/223 | 4.78  | 50.27  |
| 447 | Tubulin beta-8 chain-like protein LOC260334          | A6NNZ2 | 2407 | 22.30 | 9/102  | 4.75  | 50.17  |
| 448 | Tubulin gamma-1 chain                                | Q0VCD2 | 77   | 14.60 | 6/11   | 5.75  | 51.46  |
| 449 | Tubulin gamma-2 chain                                | Q8VCK3 | 43   | 8.40  | 4/9    | 5.80  | 51.43  |
| 450 | Tumor protein p53-inducible protein 13               | B0BN44 | 117  | 8.00  | 2/10   | 11.40 | 43.14  |
| 451 | Tyrosine-protein kinase HCK                          | P08631 | 271  | 10.60 | 6/32   | 6.27  | 60.08  |
| 452 | Tyrosine-protein kinase JAK1                         | P23458 | 62   | 9.40  | 10/12  | 7.48  | 135.02 |
| 453 | U3 small nucleolar RNA-associated protein 15 homolog | A2RRU3 | 42   | 13.40 | 8/17   | 9.15  | 59.88  |
| 454 | U3 small nucleolar RNA-associated protein 18 homolog | Q9Y5J1 | 61   | 10.80 | 4/4    | 8.93  | 62.42  |
| 455 | U4/U6 small nuclear ribonucleoprotein Prp3           | Q2KIA6 | 101  | 14.20 | 14/42  | 9.43  | 77.57  |
| 456 | Ubiquitin carboxyl-terminal hydrolase 26             | Q99MX1 | 52   | 8.90  | 6/8    | 7.95  | 96.48  |
| 457 | Ubiquitin carboxyl-terminal hydrolase 7              | Q6A4J8 | 59   | 7.80  | 9/12   | 5.29  | 129.48 |
| 458 | Ubiquitin-40S ribosomal protein S27a                 | P62978 | 1041 | 41.00 | 8/55   | 9.68  | 18.30  |
| 459 | Ubiquitin-like modifier-activating enzyme 1          | Q29504 | 67   | 10.40 | 11/15  | 5.51  | 118.70 |
| 460 | Uncharacterized protein C2orf57 homolog              | Q9DA60 | 41   | 3.00  | 2/10   | 4.22  | 56.65  |
| 461 | Unconventional myosin-Ih                             | Q8N1T3 | 41   | 16.00 | 18/36  | 9.19  | 120.05 |
| 462 | Uridine 5'-monophosphate synthase                    | Q5R514 | 45   | 10.80 | 5/7    | 6.40  | 52.55  |
| 463 | Uromodulin                                           | P07911 | 67   | 11.60 | 8/16   | 5.05  | 72.45  |
| 464 | Urotensin-2                                          | O95399 | 71   | 31.50 | 3/8    | 7.66  | 14.52  |
| 465 | Vacuolar protein sorting-associated protein 26A      | Q0VD53 | 137  | 26.00 | 8/23   | 6.13  | 38.25  |
| 466 | Vacuolar protein sorting-associated protein 35       | Q2HJG5 | 188  | 4.60  | 4/11   | 5.32  | 92.49  |
| 467 | Vasodilator-stimulated phosphoprotein                | P50551 | 101  | 32.60 | 9/13   | 7.77  | 40.50  |
| 468 | Vesicle-fusing ATPase                                | Q9QUL6 | 44   | 10.30 | 8/16   | 6.55  | 83.17  |
| 469 | Vitronectin                                          | P48819 | 72   | 8.50  | 5/16   | 5.60  | 53.34  |
| 470 | Voltage-dependent anion-selective channel protein 1  | Q9Z2L0 | 88   | 23.70 | 5/5    | 8.62  | 30.85  |
| 471 | V-type proton ATPase catalytic subunit A             | Q5R5H2 | 93   | 12.00 | 5/12   | 5.35  | 68.63  |
| 472 | WD repeat-containing protein 1                       | Q2KJH4 | 70   | 11.20 | 8/10   | 6.24  | 66.90  |
| 473 | X-ray repair cross-complementing protein 5           | P13010 | 97   | 9.80  | 9/19   | 5.55  | 83.22  |
| 474 | YTH domain-containing family protein 2               | Q0VCZ3 | 108  | 8.10  | 5/8    | 8.87  | 62.58  |

UniProt = Universal protein resource

%Cov = %Sequence coverage [(number of the matched residues/total number of residues in the entire sequence) x 100%]
